# Supplementary material for: Nanoparticles with high payloads of pipemidic acid, a poorly soluble crystalline drug: drug-initiated polymerization and self-assembly approach
Source: PubMed Central journal article supplement — Acta Pharm Sin B. 2018 Mar 27;8(3):420–31. doi: 10.1016/j.apsb.2018.03.008 (PMC5989915; doi:10.1016/j.apsb.2018.03.008), 2018-03-27
Supplement: mmc1.pdf [file mmc1.pdf]

**Original Article**

**A self-assembling prodrug approach emerges as the most efficient strategy to produce nanoparticles with high payloads of pipemidic acid, a poorly soluble crystalline antibiotic**

**Elisabetta Pancani<sup>a</sup>, Mario Menendez-Miranda<sup>a</sup>, Alexandra Pastor<sup>a,b</sup>, François Brisset<sup>c</sup>, Marie-Françoise Bernet-Camard<sup>d</sup>, Didier Desmaële<sup>b</sup>, Ruxandra Gref<sup>a,\*</sup>**

<sup>a</sup>*Institut de Sciences Moléculaires d'Orsay (ISMO), Univ. of Paris-Sud, Université Paris-Saclay, Orsay 91405, France*

<sup>b</sup>*Institut Galien, UMR8612 Univ. of Paris-Sud, Université Paris-Saclay, Châtenay-Malabry 92290, France*

<sup>c</sup>*Institut de Chimie Moléculaire et des Matériaux d'Orsay (ICMMO), Univ. of Paris-Sud, Université Paris-Saclay, Orsay 91405, France*

<sup>d</sup>*EA4043 "Unité Bactéries Pathogènes et Santé" (UBaPS), Univ. of Paris-Sud, Université Paris-Saclay, Châtenay-Malabry 92290, France*

Received 3 February 2018; received in revised form 28 February 2018 ; accepted 16 March 2018

\*Corresponding author. Tel.: +33 1 69 15 82 34.

Email address: [ruxandra.gref@u-psud.fr](mailto:ruxandra.gref@u-psud.fr) (Ruxandra Gref).

## Supplementary Information

List:

Figure S1

Figure S2

Nanoemulsion method - PIP release upon dilution

Nanoprecipitation method supplementary information

Figure S3

Figure S4

Figure S5

Figure S6

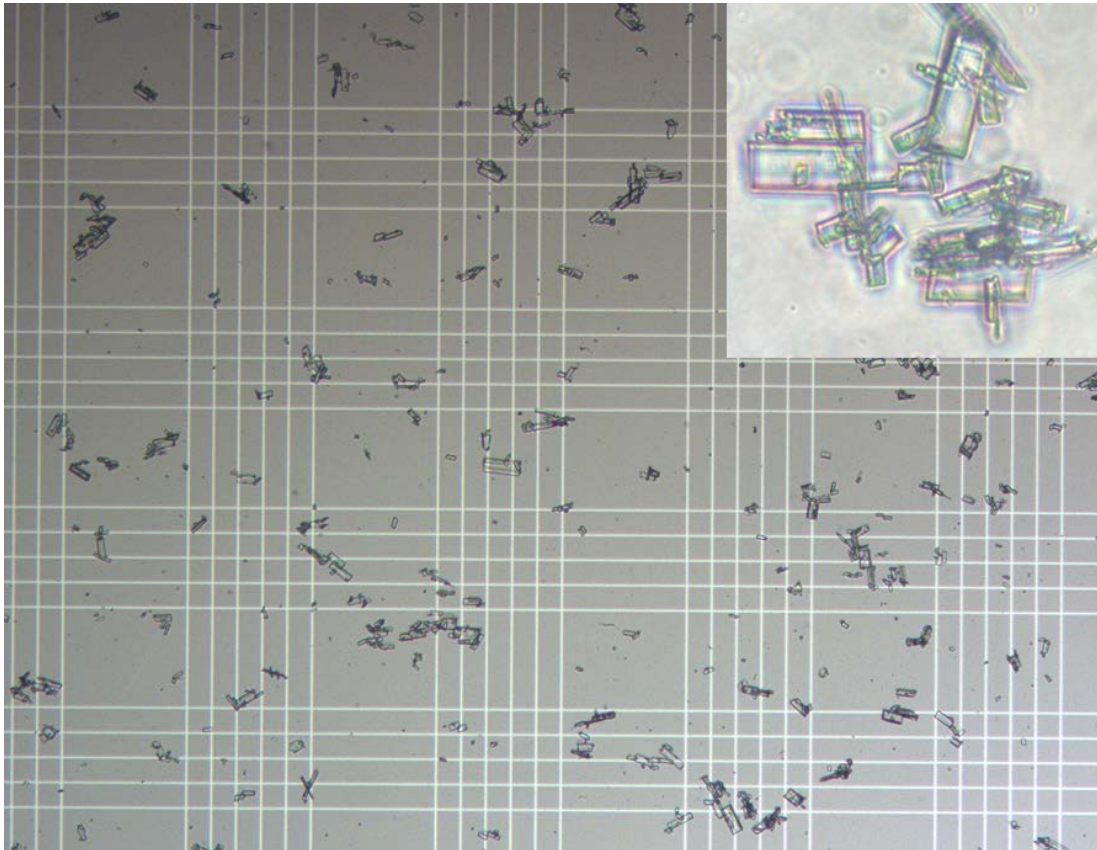

**Figure S1.** Optical image of PIP crystals in PLA/PLGA NPs. Typical example of PIP crystals formed in NPs suspension observed with 10 times and 40 times (zoomed panel) magnification in an inverted optical microscope over a Malassez chamber.

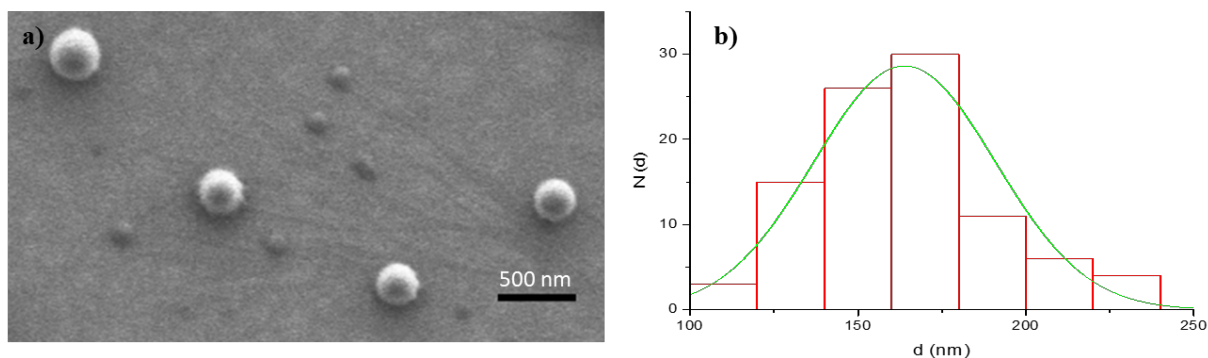

**Figure S2** PLGA PIP-loaded NPs observed by SEM. a: SEM micrograph. b: Histogram of the size distribution of the NPs showing a mean diameter  $d = 164 \pm 27$  nm.  $N(d)$  refers to the total counts and the scale bar corresponds to 500 nm.

### Nanoemulsion method - PIP release upon dilution

The release of PIP from NPs was thoroughly studied after progressive dilution in water and PIP content was lost within less than 5 min. Interestingly, there was a correlation between the amount of burst-released drug and the dilution factor. For example, the DL of NPs made using polymer P33 (see Main text - method section 4.1) decreased from 8.7% to 4.1%, 2.4% and 1.7% ( $w/w$ ) after 0, 10, 20 and 50 times dilution, respectively.

### Nanoprecipitation method supplementary information

The P19 NPs were formulated in presence and in absence of PIP. Interestingly, the size measurement of the obtained particles highlighted a 50–60 nm difference in the mean size of empty and loaded NPs. For example, in the case of a final P19 concentration of 5 mg/mL, the empty NPs displayed a size of  $170 \pm 1.3$  nm while the loaded ones of only  $117 \pm 1.6$  nm (PIP/P19 ratio =1:10). The same behavior was evidenced also when increasing P19 final concentration to 10 mg/mL (or higher) (empty NPs=  $212 \pm 2.3$  nm, PIP NPs=  $150 \pm 2$  nm). The same tendency was evidenced also when formulating the NPs by using other polymers.

## Supplementary Information

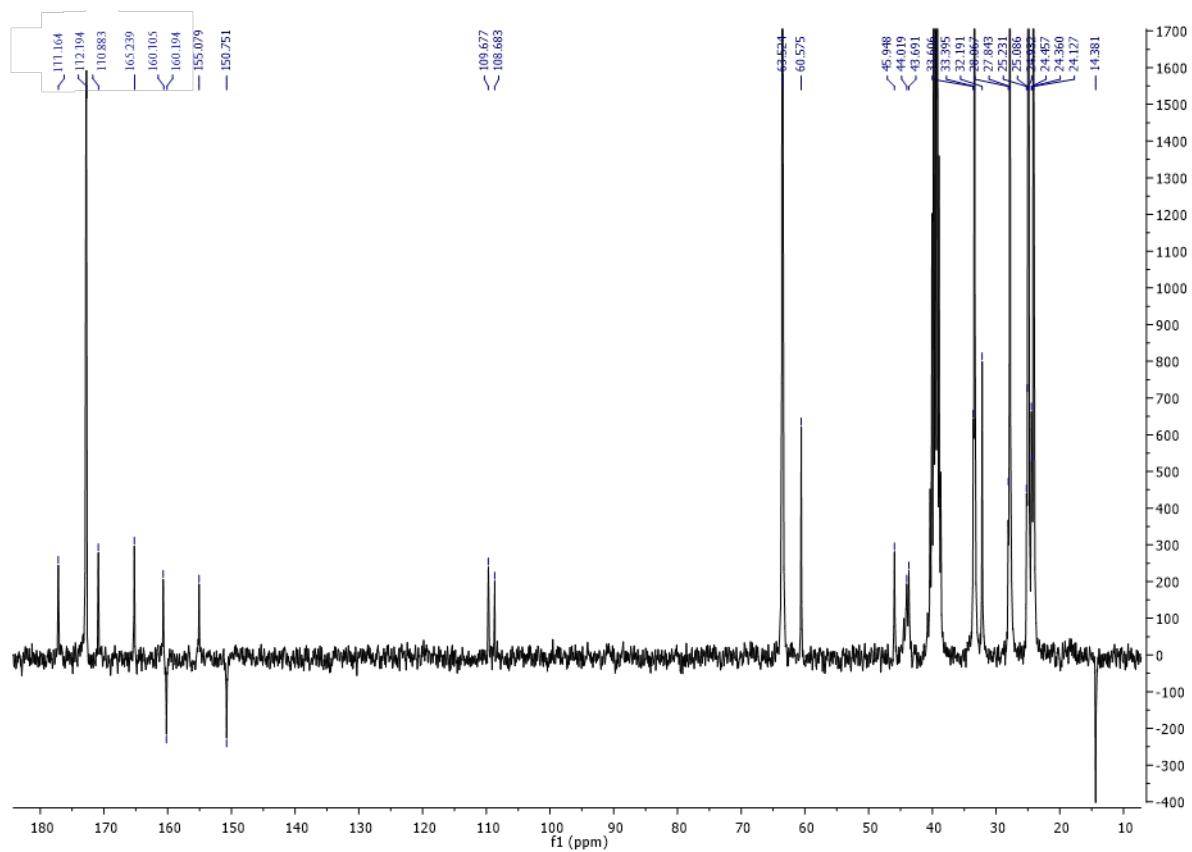

**Figure S3**  $^{13}\text{C}$  NMR spectrum of PCL-PIP in  $\text{DMSO-}d_6$ .

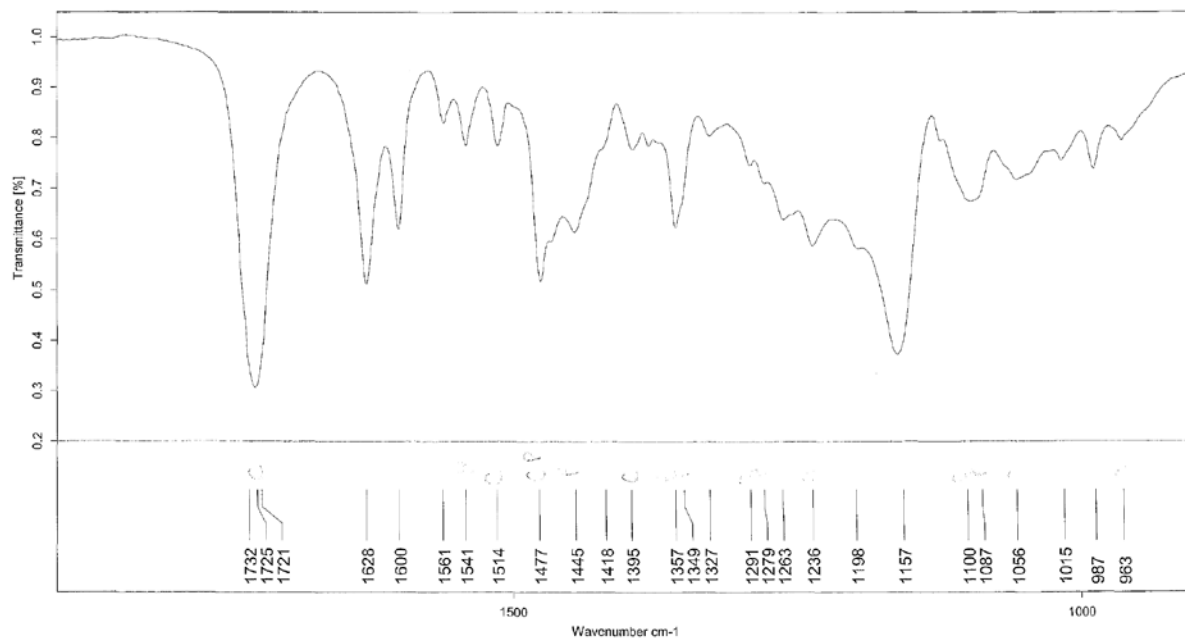

**Figure S4** IR spectrum of PCL-PIP.

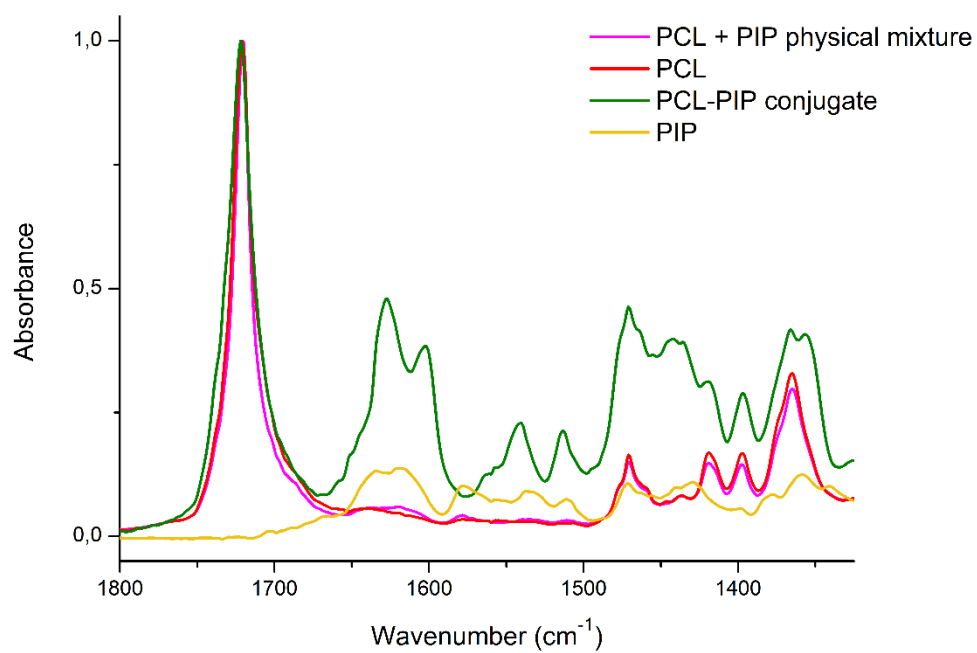

**Figure S5** IR spectra of PCL, PIP, PCL-PIP conjugate and a physical mixture of PCL and PIP.

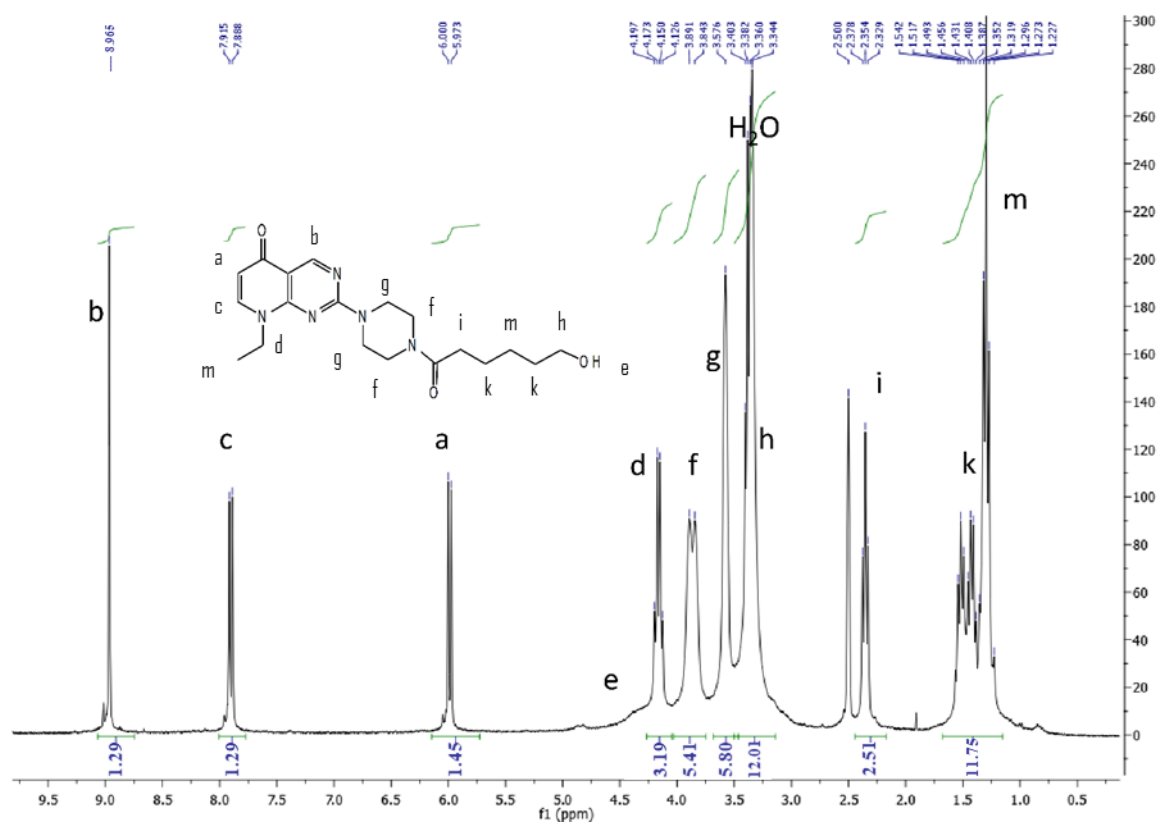

**Figure S6** <sup>1</sup>H NMR of decarboxylated caprolactone adduct (**4**) (see Fig. 2 main manuscript).

## Supplementary Information
